# Supplementary material
Source: PubMed Central journal article supplement (PMC6661172)
Supplement: NIHMS1530156-supplement-Supplemental_Figure_1.pdf [file NIHMS1530156-supplement-Supplemental_Figure_1.pdf]

Extended Data Figure 2c

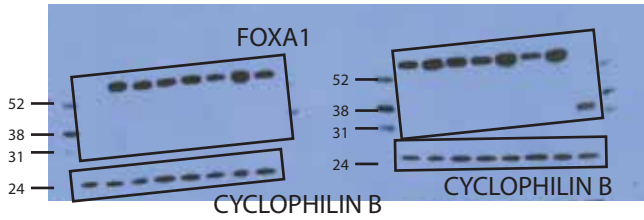

Loading control and FOXA1 blots are from the same corresponding gel

Extended Data Figure 3b

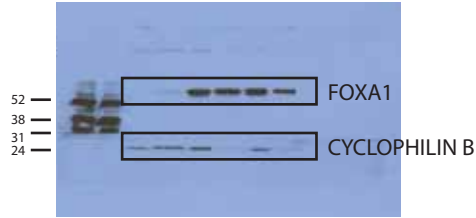

Loading control and FOXA1 blots are from the same gel

Extended Data Figure 4b

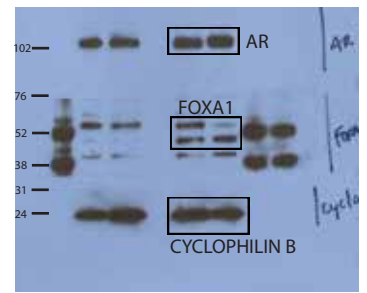

Loading control and all blots are from the same gel

Extended Data Figure 3c

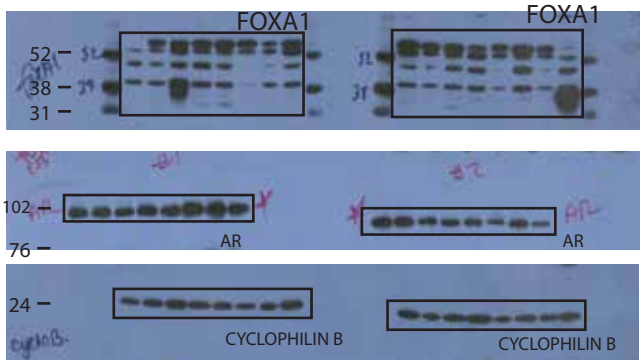

Loading control and all blots are from the same corresponding gel

Extended Data Figure 4e

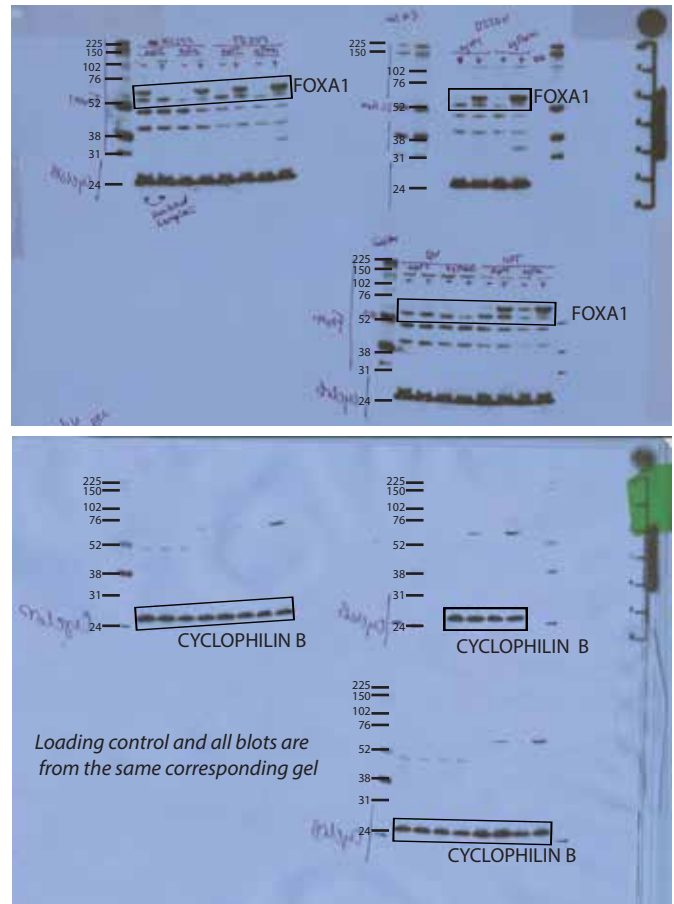

Loading control and all blots are from the same corresponding gel

Extended Data Figure 4h

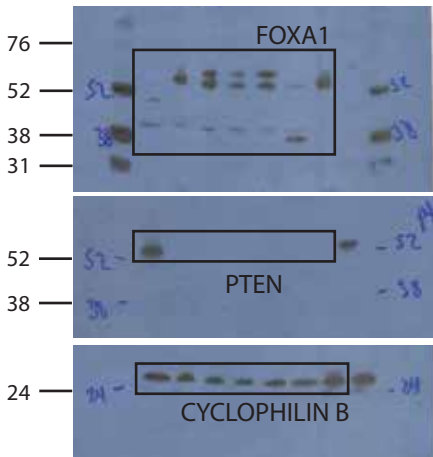

Loading control and FOXA1 blots are from the same gel. PTEN blot was from an identical gel run in parallel.

Extended Data Figure 5b

Left panels:

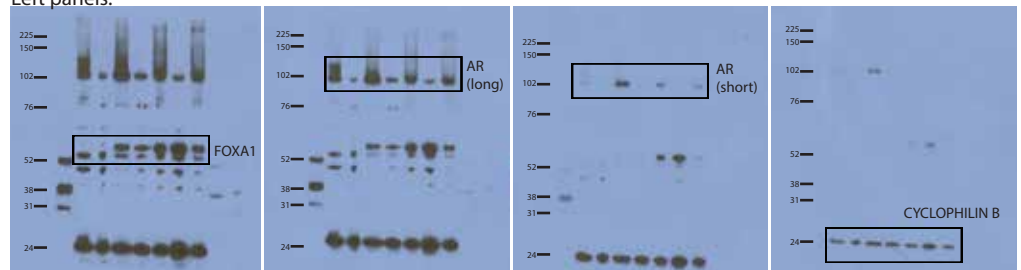

Right panels:

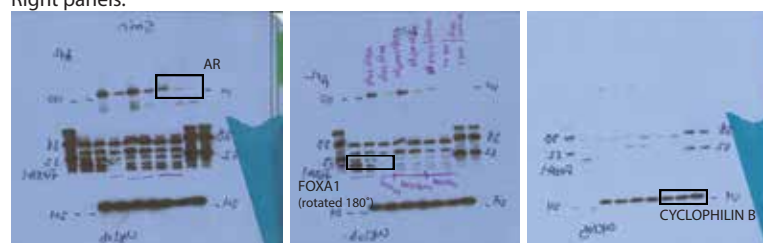

Loading control and all blots are from the same corresponding gels.
